# Supplementary material
Source: publisher figshare collection journal article supplement (https://frontiersin.figshare.com/ndownloader/files/29090091)
Supplement: Supplementary file 1 [file 29090091]

**Table S1**．The sampling information at each plot.

| Altitude (m) | Longitude & Latitude | Sampling Date | Individuals | Twigs | Florals | Leaves |
| --- | --- | --- | --- | --- | --- | --- |
| 2945 | 102.9612°E, 31.3377°N  102.9610°E, 31.3345°N  102.9605°E, 31.3350°N | 2019.6.16 | 13 | 61 | 223 | 351 |
| 3102 | 102.9378°E, 31.2984°N  102.9378°E, 31.2989°N  102.9381°E, 31.2994°N  102.9375°E, 31.3016°N | 2019.6.18 | 20 | 90 | 323 | 518 |
| 3326 | 102.9247°E, 31.2843°N  102.9252°E, 31.2847°N  102.9261°E, 31.2869°N | 2019.6.25 | 10 | 50 | 266 | 315 |
| 3505 | 102.9125°E, 31.2749°N  102.9122°E, 31.2727°N  102.9094°E, 31.2714°N | 2019.6.28 | 14 | 70 | 301 | 426 |
| 3657 | 102.8749°E, 31.2320°N  102.8740°E, 31.2316°N  102.8729°E, 31.2313°N  102.8727°E, 31.2303°N | 2019.7.3 | 17 | 82 | 369 | 541 |
